# Supplementary material for: MnO–nitrogen doped graphene as a durable non-precious hybrid catalyst for the oxygen reduction reaction in anion exchange membrane fuel cells
Source: Royal Society of Chemistry journal article supplement (doi:10.1039/c6ra20627a), 2016-01-01
Supplement: c6ra20627a1.pdf [file c6ra20627a1.pdf]

*Electronic Supplementary Information*

**MnO-Nitrogen Doped Graphene as Durable Non-Precious Hybrid Catalyst for Oxygen Reduction Reaction in Anion Exchange Membrane Fuel Cells**

**A. Arunchander,<sup>a</sup> M. Vivekanantha,<sup>a,b</sup> S. Gouse Peera<sup>a</sup> and A. K. Sahu<sup>a,\*</sup>**

*<sup>a</sup>CSIR-Central Electrochemical Research Institute-Madras Unit, CSIR Madras Complex, Taramani, Chennai - 600 113, INDIA.*

*<sup>b</sup>Department of Physics & Nanotechnology, SRM University, Kattankulathur-603203, Kancheepuram District, INDIA.*

**Table S1** Comparative ORR performance of previously reported various electrocatalysts.

| <b>Catalysts</b>                                                          | <b>Loading (<math>\mu\text{g cm}^{-2}</math>)</b> | <b>On-set potential (V)</b> | <b><math>E_{1/2}</math> (V)</b> | <b><math>j @ -0.6</math> V (<math>\text{mA cm}^{-2}</math>)</b> | <b>Tafel slope (<math>\text{mV dec}^{-1}</math>)</b> | <b>Ref.</b>  |
|---------------------------------------------------------------------------|---------------------------------------------------|-----------------------------|---------------------------------|-----------------------------------------------------------------|------------------------------------------------------|--------------|
| <b>N-rGO/<br/><math>\text{Mn}_3\text{O}_4</math></b>                      | 100                                               | -0.075 vs. SCE              | NA                              | 2.0                                                             | NA                                                   | S1           |
| <b><math>\text{MnO}/\text{NRG}</math></b>                                 | NA                                                | -0.15 vs. Ag/AgCl           | NA                              | 1.4                                                             | NA                                                   | S2           |
| <b><math>\text{Mn}_3\text{O}_4/\text{NG}</math></b>                       | 425                                               | -0.12 vs. Ag/AgCl           | -0.20                           | 4.4                                                             | 62                                                   | S3           |
| <b>Holey GS/<br/><math>\text{Mn}_3\text{O}_4</math></b>                   | 310                                               | -0.14 vs. Ag/AgCl           | -0.33 vs. Ag/AgCl               | 4.2                                                             | 73                                                   | S4           |
| <b>Mesoporous Hybrid<br/><math>\text{Mn}_3\text{O}_4/\text{NG}</math></b> | 200                                               | -0.09 vs. Ag/AgCl           | NA                              | 3.7                                                             | NA                                                   | S5           |
| <b><math>\text{MnO}_2/\text{rGO}</math><br/>Nanosheets</b>                | 150                                               | -0.178 vs. SCE              | -0.32 vs. SCE                   | 3.0                                                             | NA                                                   | S6           |
| <b>CPS–Cu<sub>20</sub><br/>(<math>\text{Cu}_x\text{S}_y</math>)</b>       | 1000                                              | 0.84 vs. RHE                | 0.75 vs. RHE                    | NA                                                              | NA                                                   | S7           |
| <b><math>\text{NiCo}_2\text{S}_4@\text{N}</math><br/>/S-rGO</b>           | 283                                               | -0.11 vs. Ag/AgCl           | -0.18 Ag/AgCl                   | 4.2                                                             | NA                                                   | S8           |
| <b><math>\text{Fe}_3\text{O}_4/\text{N-GA}</math></b>                     | 150                                               | -0.19 vs. Ag/AgCl           | -0.35 vs. Ag/AgCl               | NA                                                              | NA                                                   | S9           |
| <b>CoTe/C-900</b>                                                         | NA                                                | -0.18 vs. Ag/AgCl           | -0.35 vs. Ag/AgCl               | 2.9                                                             | 62                                                   | S10          |
| <b><math>\text{MnO}/\text{N-G-900}</math><br/>(10%)</b>                   | 600                                               | 0.89 vs. RHE                | 0.77 vs. RHE                    | 3.4                                                             | 81                                                   | Present work |

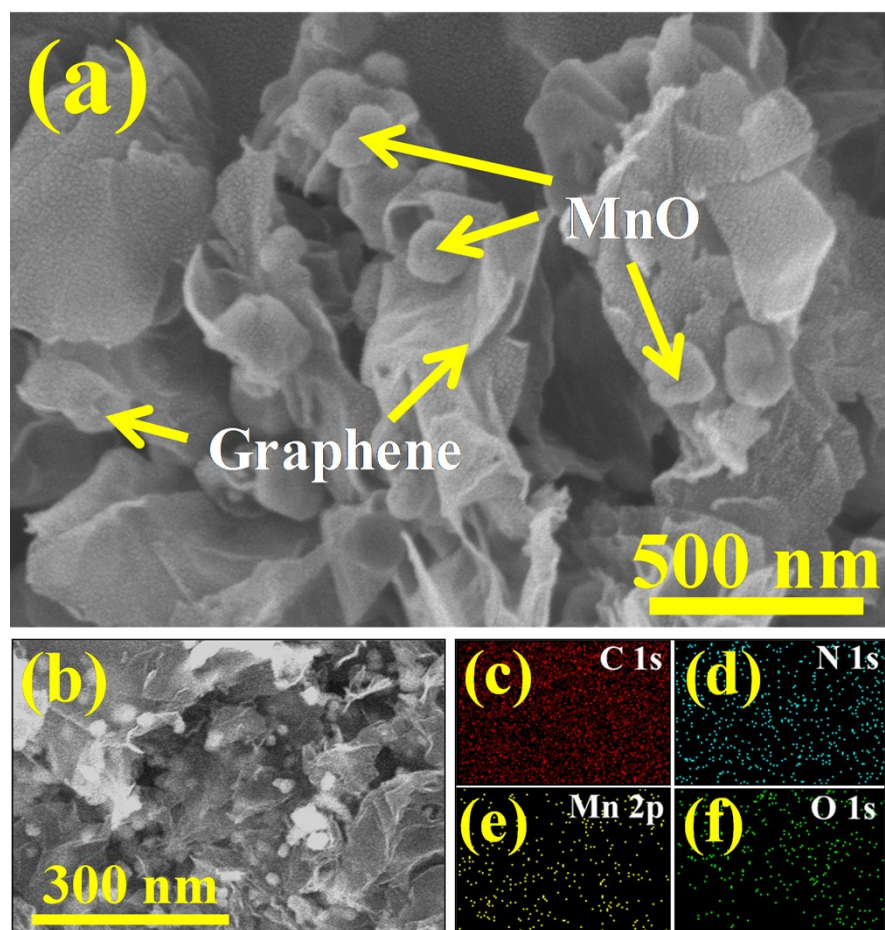

**Fig. S1.** (a) HR-SEM images, (b) selected area HR-SEM image considered for mapping, (c), (d), (e) and (f) corresponding EDS elemental mappings of C, N, Mn and O, respectively of MnO/NG-900 (10%) electrocatalyst.

## RHE calibration

Saturated calomel electrode (SCE) was used as the reference electrode in all measurements. It was calibrated with respect to reversible hydrogen electrode (RHE). The calibration was accomplished in high purity hydrogen saturated 0.1 M aqueous KOH electrolyte with a Pt wire as the working electrode. CVs were performed between -1.2 to -0.9 V (vs. SCE) at a scan rate of 1 mV s<sup>-1</sup>. The average of the two potentials which crosses zero was considered to be the thermodynamic potential for the hydrogen electrode reactions.

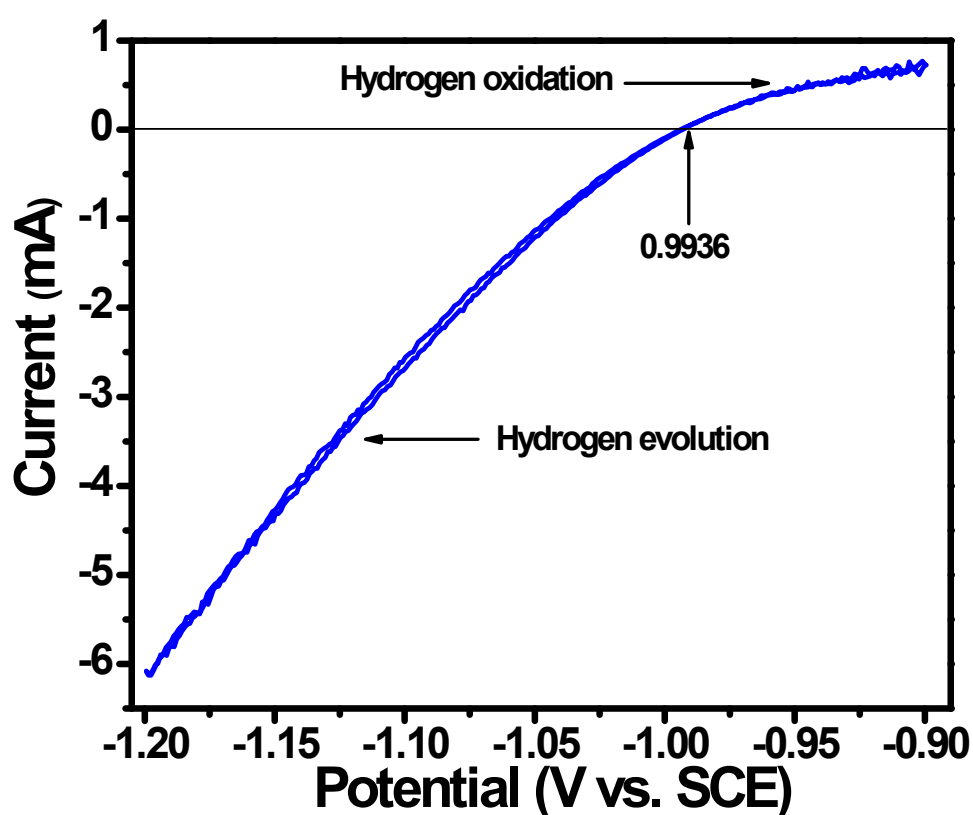

**Fig. S2.** CV for RHE calibration of SCE reference electrode recorded between -1.2 to -0.9 V (vs. SCE) in high purity H<sub>2</sub> saturated 0.1 M aqueous KOH electrolyte at a scan rate of 1 mV s<sup>-1</sup>. Therefore, in 0.1 M KOH electrolyte,  $E(\text{RHE}) = E(\text{SCE}) + 0.9936 \text{ V}$ .

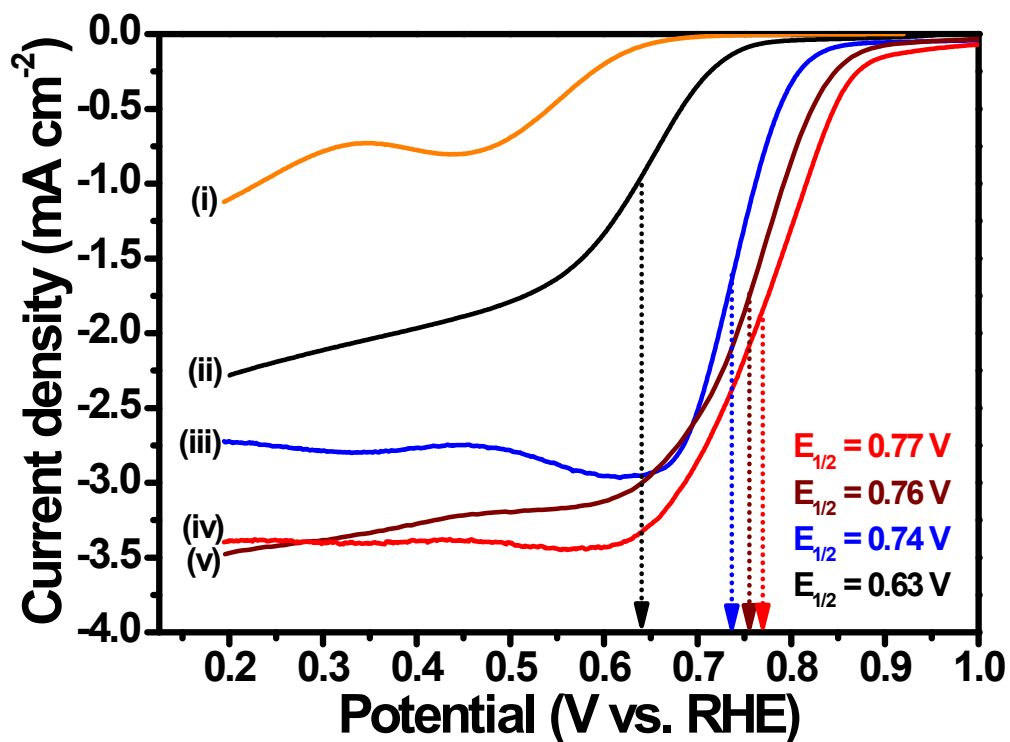

**Fig. S3.** LSVs of (i) MnO, (ii) N-doped graphene, (iii) Mn<sub>3</sub>O<sub>4</sub>/G-700, (iv) MnO/G-900 and (v) MnO/NG-900 (10%) recorded in O<sub>2</sub> saturated 0.1 M aqueous KOH electrolyte at a scan rate of 5 mV s<sup>-1</sup> with the rotational rate of 1600 rpm.

## References

- S1 M. S. El-Deab and T. Ohsaka, *Angew. Chem. Int. Ed.*, 2006, **45**, 5963.
- S2 R. Chen, J. Yan, Y. Liu and J. Li, *J. Phys. Chem. C*, 2015, **119**, 8032.
- S3 S. K. Bikkarolla, F. Yu, W. Zhou, P. Joseph, P. Cumpson and P. Papakonstantinou, *J. Mater. Chem. A*, 2014, **2**, 14493.
- S4 X. Lv, W. Lv, W. Wei, X. Zheng, C. Zhang, L. Zhi and Q. H. Yang, *Chem. Commun.*, 2015, **51**, 3911.
- S5 J. Duan, Y. Zheng, S. Chen, Y. Tang, M. Jaroniec and S. Qiao, *Chem. Commun.*, 2013, **49**, 7705.
- S6 D. Guo, S. Dou, X. Li, J. Xu, S. Wang, L. Lai, H. K. Liu, J. Ma and S. X. Dou, *Int. J. Hyd. Energy*, 2016, **41**, 5260.
- S7 M. Seredych, E. Rodriguez-Castellon and T. J. Bandosz, *J. Mater. Chem. A*, 2014, **2**, 20164.
- S8 Q. Liu, J. Jin and J. Zhang, *ACS Appl. Mater. Interfaces*, 2013, **5**, 5002.
- S9 Z. S. Wu, S. Yang, Y. Sun, K. Parvez, X. Feng and K. Müllen, *J. Am. Chem. Soc.*, 2012, **134**, 9082.
- S10 G. Wu, G. Cui, D. Li, P. K. Shen and N. Li, *J. Mater. Chem.*, 2009, **19**, 6581.
